# Supplementary material
Source: PubMed Central journal article supplement (PMC6069972)
Supplement: NIHMS620079-supplement-Supplemental_Data.pdf [file NIHMS620079-supplement-Supplemental_Data.pdf]

## Supplemental Material

### Supplemental Figure Legends

**Supplemental Fig I.** Wnt3a conditioned medium (Wnt3a-CM) increases total as well as active (dephosphorylated)  $\beta$ -catenin in BAEC. Data is representative of 3 experiments.

**Supplemental Fig II.** (a) Wnt3a-CM increases active  $\beta$ -catenin in HUVEC. (b & c) Recombinant Wnt3a increases  $\beta$ -catenin in HUVEC in a dose and time-dependent manner. (d) Wnt3a (200 ng/ml) stimulates rapid phosphorylation of p66shc in HUVEC. Data is representative of 3 experiments.

**Supplemental Fig III.** Wnt3a or non-phosphorylatable active  $\beta$ -catenin (S37A) do not inhibit sodium-nitroprusside (SNP)-stimulated endothelium-independent vasorelaxation of mouse aortas. There was no significant difference between the groups.  $n = 3-5$ . (a) Ref # Fig. 4a (b) Ref # Fig. 4c (c) Ref # Fig. 4e. All values are shown as Mean  $\pm$  SEM.

**Supplemental Fig IV.** High-fat diet (HFD)-feeding leads to (a) impaired endothelium-dependent vasorelaxation, and (b) decreased NO bioavailability. (c) HFD-feeding has no effect on SNP-stimulated endothelium-independent vasorelaxation ND = normal diet. All values are shown as Mean  $\pm$  SEM. \*  $P < 0.05$ , \*\*\*  $P < 0.001$  vs. ND.  $N=3-12$ .

**Supplemental Fig V.** Decreased HFD-induced aortic fatty streak formation (Oil-Red-O staining) in mice transgenic for p66<sup>Shc</sup> shRNA (p66<sup>Shc</sup>RNAi).  $N = 3-4$ . All values are shown as Mean  $\pm$  SEM. \*  $P < 0.05$  vs. WT-ND.

**Supplemental Fig VI.** Schematic showing proposed model of canonical Wnt signaling in the endothelium and vasculature, and the role of p66shc and ROS in this model. LRP: low-density lipoprotein receptor-related protein; Fz: Frizzled receptor. In addition to TNF $\alpha$ , other target genes of  $\beta$ -catenin in the endothelium that could potentially contribute to vascular oxidative stress and endothelial dysfunction are not shown.

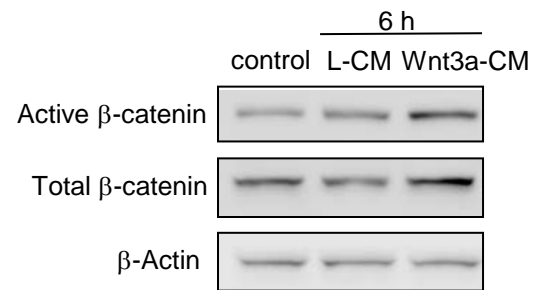

Figure 1

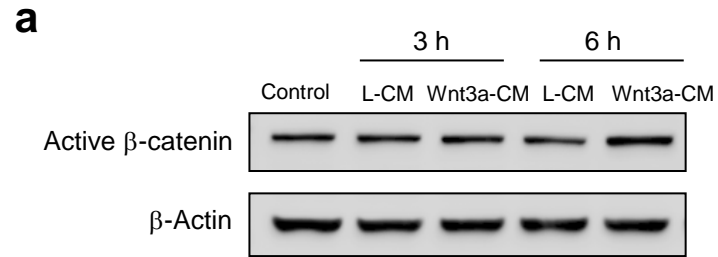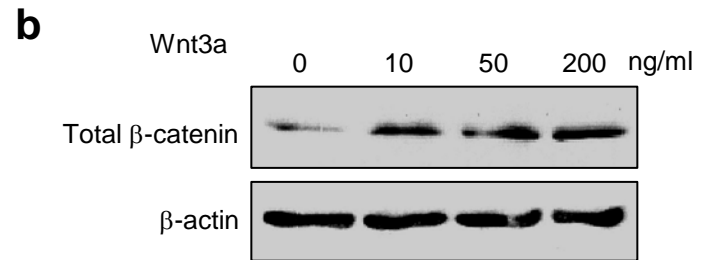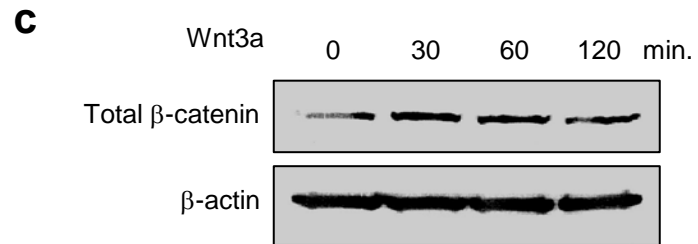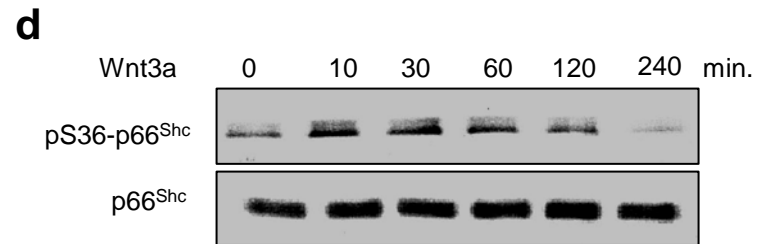

Figure II

**a**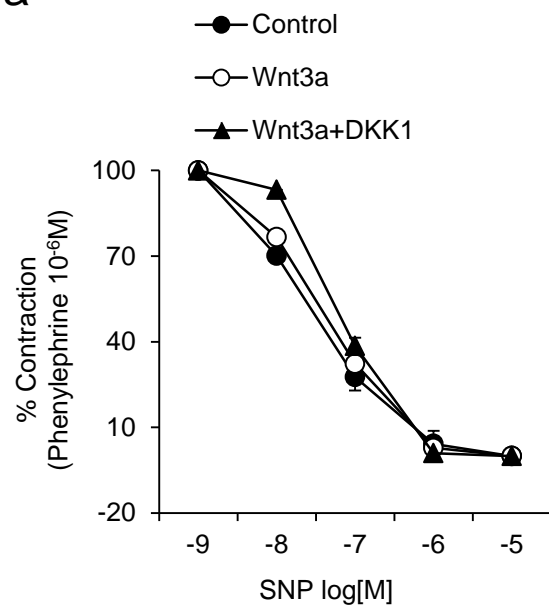**b**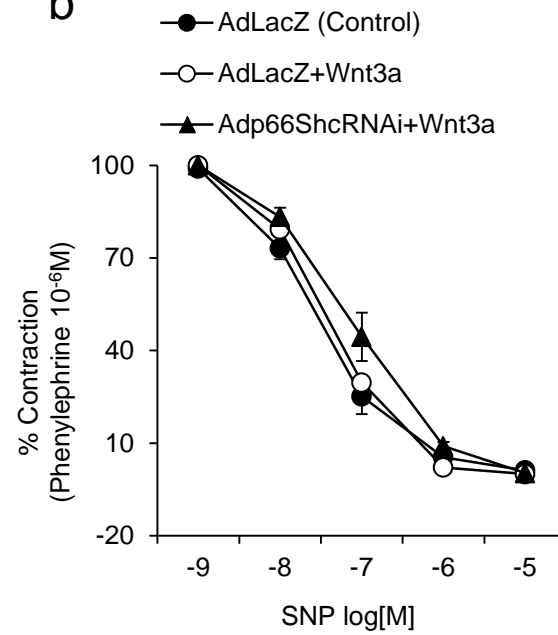**c**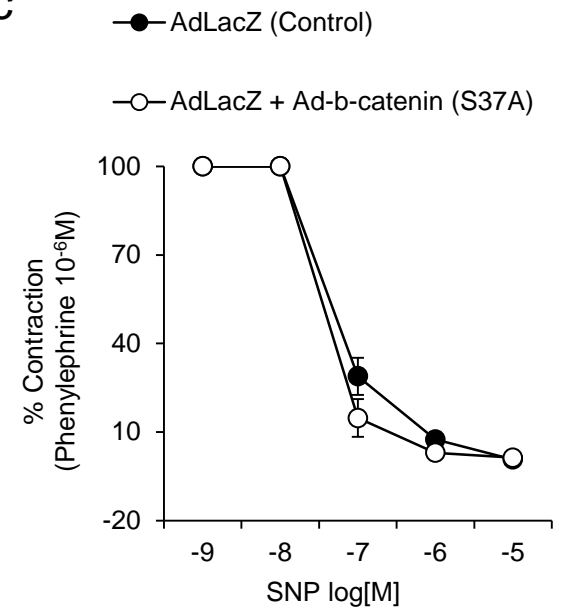

Figure III

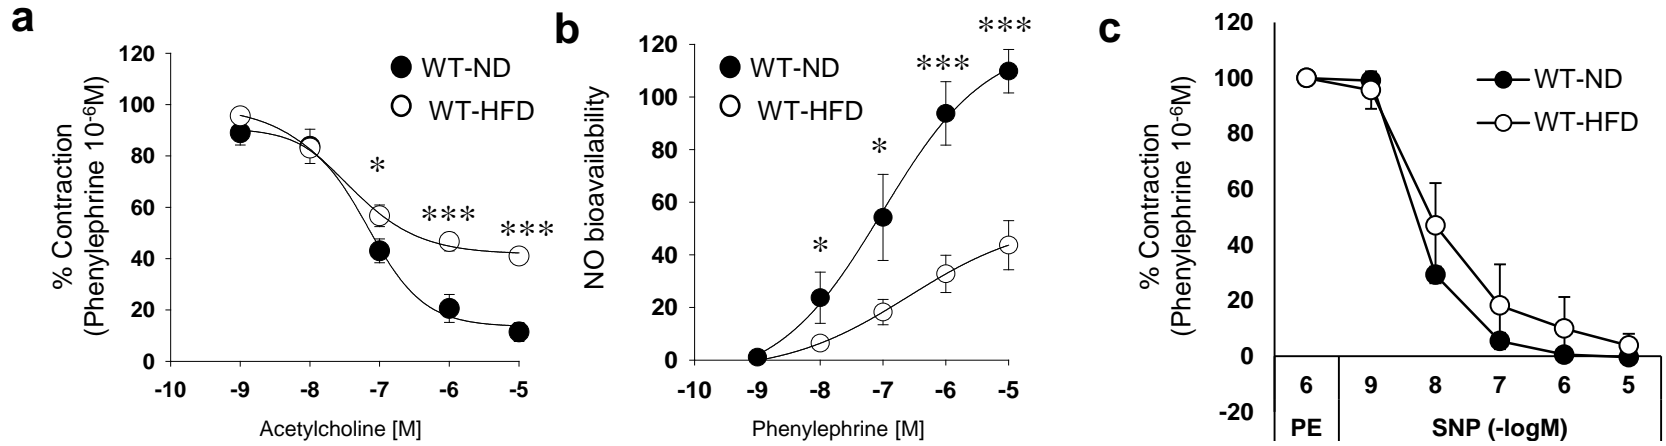

Figure IV

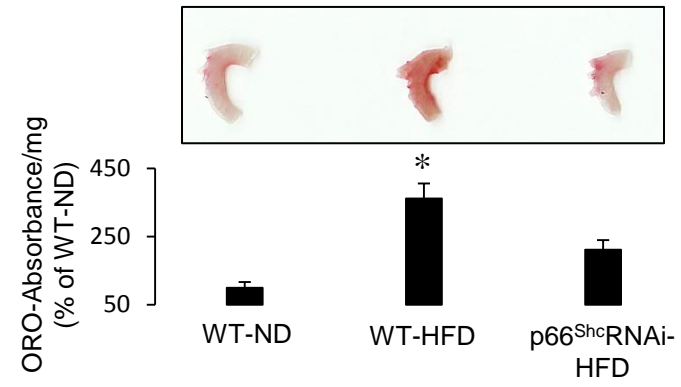

Figure V

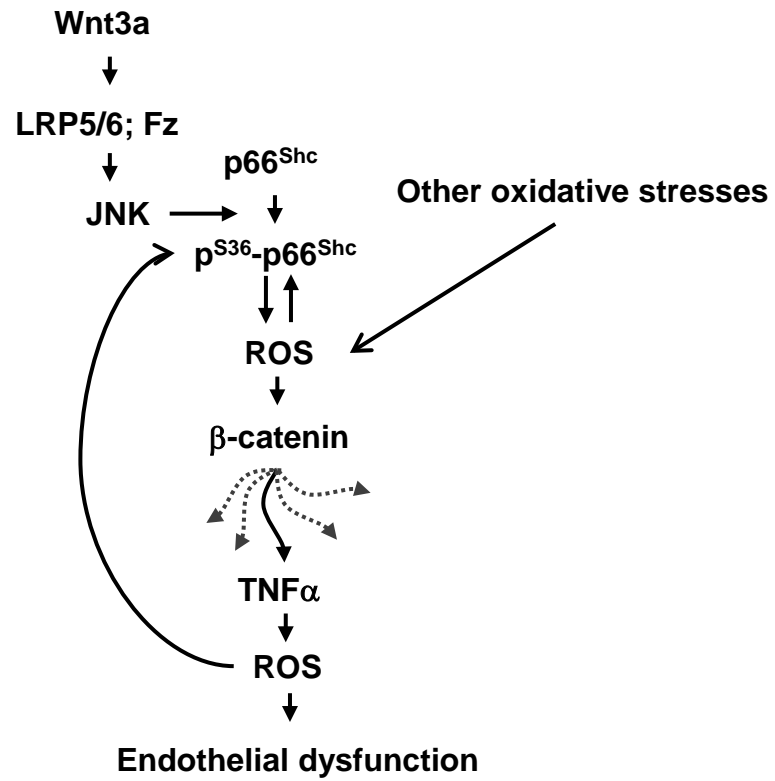

Figure VI
